# Supplementary material for: Positive Selection and Functional Divergence of R2R3-MYB Paralogous Genes Expressed in Inflorescence Buds of Scutellaria Species (Labiatae)
Source: MDPI journal article supplement (doi:10.3390/ijms16035900), 2015-03-13
Supplement: s1 [file s1]

# Supplementary Information

A

NJ Phylogeny Test: Bootstrap method  
No. of Bootstrap Replications : 1000  
Substitutions Type: **Nucleotide**  
Model/Method: Maximum  
Composite Likelihood model  
Gaps/Missing Data Treatment:  
Pairwise deletion

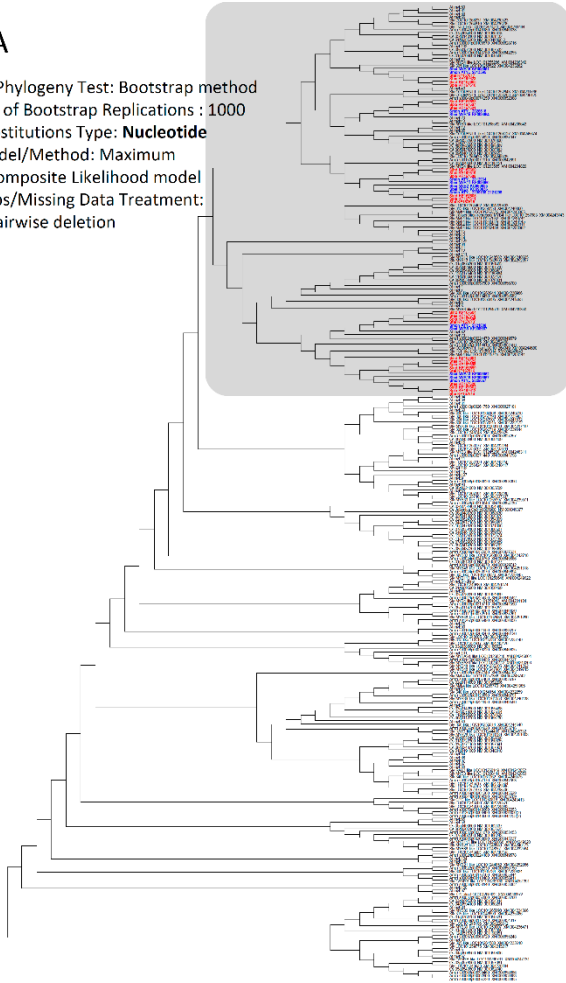

B

NJ Phylogeny Test: Bootstrap method  
No. of Bootstrap Replications : 1000  
Substitutions Type: **Amino acid**  
Model/Method: Jones-Taylor-  
Thornton (JTT) model  
Gaps/Missing Data Treatment:  
Pairwise deletion

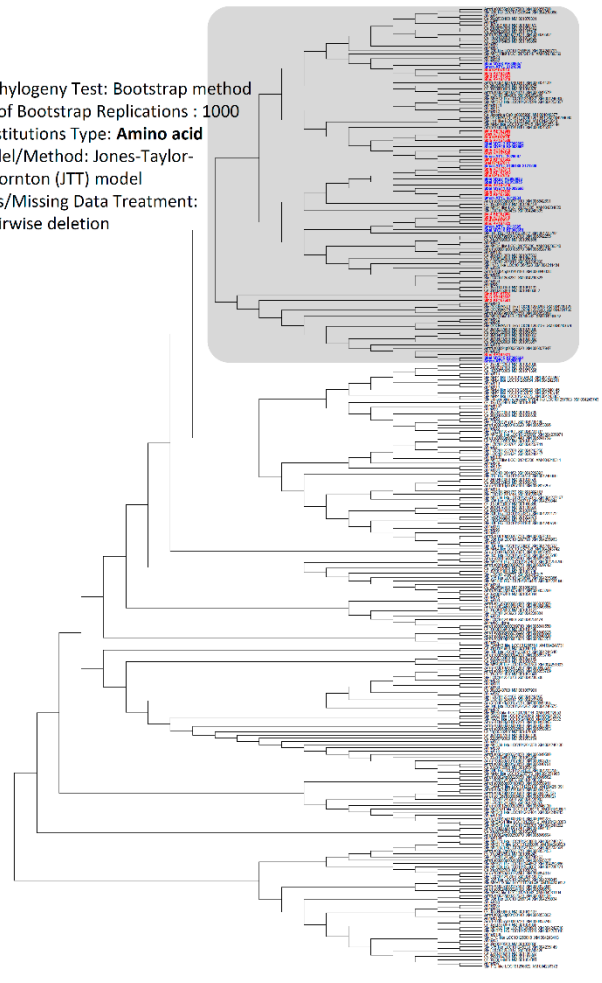

Figure S1. Cont.

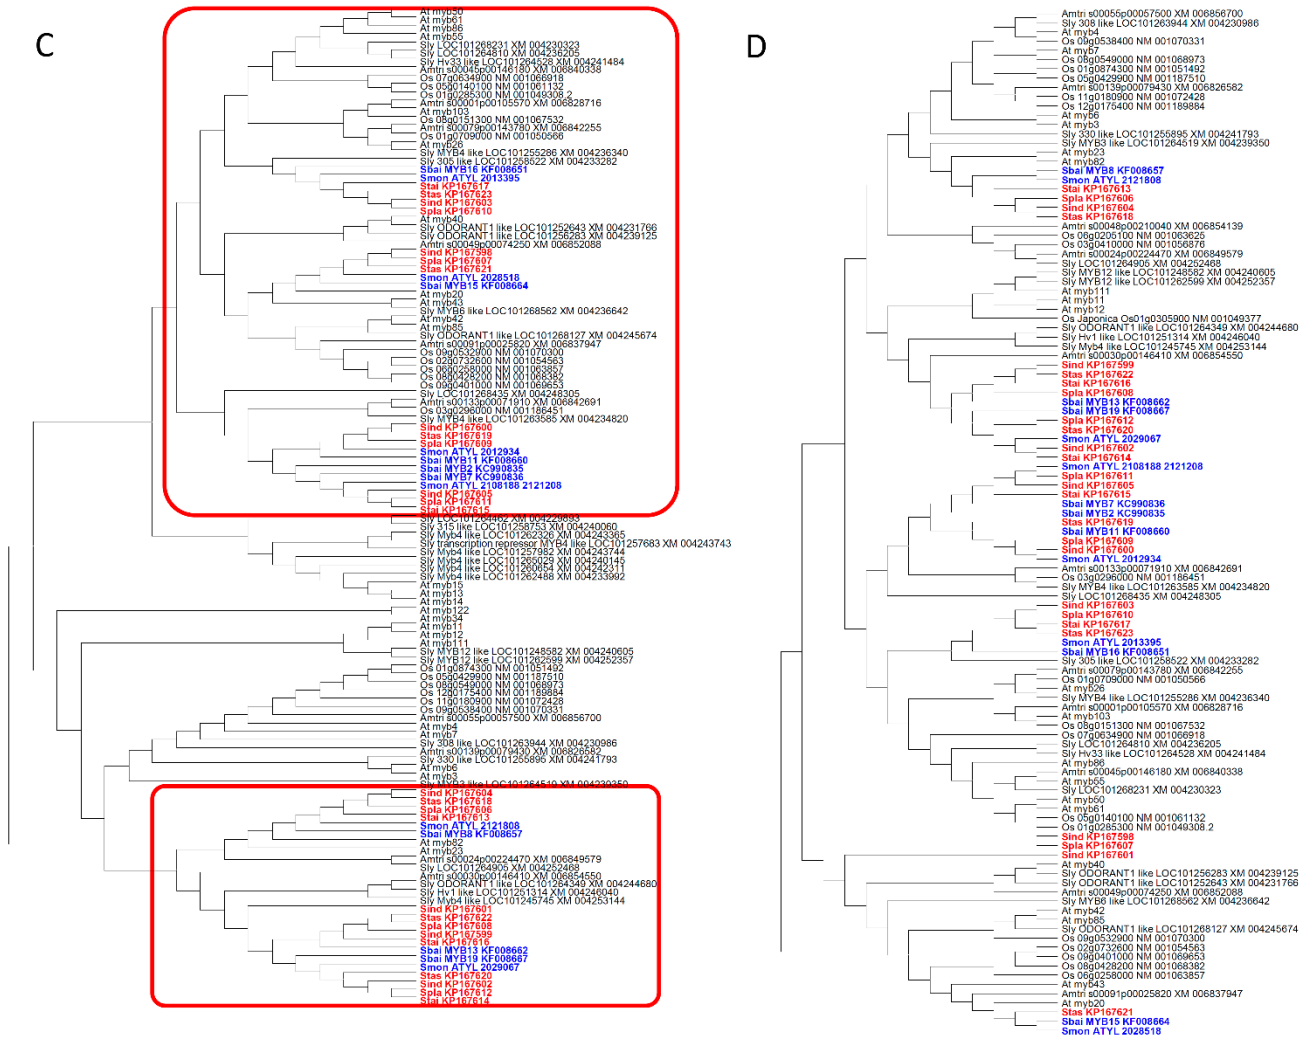

**Figure S1.** Cladogram of the *Scutellaria* R2R3-MYBs extracted from the inflorescence-bud transcriptomic library of *Scutellaria* and the published R2R3-MYBs from GenBank. (A) Neighbor-joining tree reconstructed based on the nucleotide sequences; (B) Neighbor-joining tree reconstructed based on the amino acid sequences. The gray boxes are the clade including the *Scutellaria* R2R3-MYBs and the corresponding sequences of *Amborella trichopoda* (Amtri), *Arabidopsis thaliana* (At), *Oryza sativa* (Os), and *Solanum lycopersicum* (Sly); (C) and (D) are enlargements of the gray areas of Figure S1A,B, respectively. Based on Figure S1C, the *Scutellaria* R2R3-MYBs and the sequences that were grouped with *Scutellaria* R2R3-MYBs were selected (the red frames) and realigned to re-perform the NJ analysis shown in Figure 1. Sbai: *Scutellaria baicalensis*; Sind: *Scutellaria indica*; Smon: *Scutellaria montana*; Spla: *Scutellaria playfairii*; Stai: *Scutellaria taiwanensis*; Stas: *Scutellaria tashiroi*.

|                                    | 5     | 15     | 25  | 35  | 45    | 55    | 65   | 75   | 85   | 95   | 105 |     |
|------------------------------------|-------|--------|-----|-----|-------|-------|------|------|------|------|-----|-----|
| Amtri_s00001p00105570_XM_006828716 | MGHHS | CCNQ   | KV  | RGL | WSP   | EDEK  | LRYI | T    | SN   | YG   | -CW | SE  |
| Amtri_s00024p00224470_XM_006849579 | MGRPC | CCSK   | GL  | NKG | AW    | ED    | IL   | TD   | YK   | TH   | EG  | -KW |
| Amtri_s00030p00146410_XM_006854550 | MGRAP | CCSKV  | GL  | LR  | GP    | IA    | ED   | TL   | LK   | RY   | IE  | TH  |
| Amtri_s00045p00146180_XM_006840338 | MGRHS | CCYKQ  | KL  | RK  | GL    | WSP   | EDEK | LRIH | T    | SN   | YG  | -CW |
| Amtri_s00079p00143780_XM_006842255 | MGHHS | CCNQK  | KV  | RR  | GL    | WSP   | EDEK | LNIH | A    | Y    | GH  | -CW |
| Amtri_s00133p00071910_XM_006842691 | MGRP  | PCDDK  | SV  | RK  | GP    | WT    | ED   | AK   | IL   | AY   | GH  | -WT |
| Os_0s01g0285300_NM_001049308.2     | MGHHS | CCNQK  | KV  | RR  | GL    | WSP   | EDEK | LKVI | S    | TH   | GH  | -CW |
| Os_0s01g0790900_NM_001050566       | MGRP  | PCCEKV | GL  | KK  | GP    | WT    | AD   | ED   | KL   | IN   | FI  | TH  |
| Os_0s02g0732600_NM_001054563       | MGRP  | PCCKA  | NV  | KK  | GP    | WT    | AE   | ED   | AK   | L    | AY  | TH  |
| Os_0s03g0296000_NM_001186451       | MGRHS | CCYKQ  | KL  | RK  | GL    | WSP   | EDEK | LNIH | T    | SN   | YG  | -CW |
| Os_0s05g0140100_NM_001061132       | MGRP  | PCCKV  | GL  | KK  | GP    | WT    | AE   | ED   | KL   | V    | AF  | TH  |
| Os_0s07g0634900_NM_001066918       | MAK   | RAGG   | ARK | LR  | RL    | GL    | WSP  | EDEK | LNIH | A    | Y   | GH  |
| Os_0s08g0151300_NM_001067532       | MGHHS | CCNQK  | KV  | RR  | GL    | WSP   | EDEK | LRYI | T    | SN   | YG  | -CW |
| Os_0s08g0428200_NM_001068382       | MGRP  | PCCKV  | GL  | KK  | GP    | WT    | AE   | ED   | KL   | I    | RF  | TH  |
| Os_0s09g0401000_NM_001069653       | MGRP  | PCCKV  | GL  | KK  | GP    | WT    | AE   | ED   | KL   | V    | AF  | TH  |
| Os_0s09g0532900_NM_001070300       | MGRP  | PCCKL  | GV  | KK  | GP    | WT    | AE   | ED   | KL   | M    | SF  | TH  |
| At_myb103                          | MGHHS | CCNQK  | KV  | RR  | GL    | WSP   | EDEK | LRYI | T    | SN   | YG  | -CW |
| At_myb20                           | MGRP  | PCCKV  | GL  | KK  | GP    | WT    | AE   | ED   | KL   | I    | RF  | TH  |
| At_myb23                           | MRM   | TRD    | KG  | E   | Y     | KK    | L    | W    | T    | V    | Y   | TH  |
| At_myb26                           | MGHHS | CCNQK  | KV  | RR  | GL    | WSP   | EDEK | LRYI | T    | SN   | YG  | -CW |
| At_myb36                           | MGRAP | CCCKA  | NV  | KK  | GP    | WSP   | E    | D    | K    | L    | I   | RF  |
| At_myb42                           | MGRP  | PCCKL  | GV  | KK  | GP    | WT    | AE   | ED   | KL   | I    | RF  | TH  |
| At_myb43                           | MGRP  | PCCKV  | GL  | KK  | GP    | WT    | AE   | ED   | KL   | I    | RF  | TH  |
| At_myb5                            | KK    | T      | P   | CC  | T     | GM    | K    | R    | GP   | W    | T   | V   |
| At_myb50                           | MGRHS | CCYKQ  | KL  | RK  | GL    | WSP   | EDEK | LNIY | T    | SN   | YG  | -CW |
| At_myb55                           | MGRHS | CCYKQ  | KL  | RK  | GL    | WSP   | EDEK | LRYI | T    | SN   | YG  | -CW |
| At_myb61                           | MGRHS | CCYKQ  | KL  | RK  | GL    | WSP   | EDEK | LNIY | T    | SN   | YG  | -CW |
| At_myb68                           | MGRAP | CCCKA  | NV  | KK  | GP    | WSP   | E    | D    | K    | L    | I   | RF  |
| At_myb82                           | ME    | K      | R   | E   | E     | G     | K    | S    | Y    | V    | R   | K   |
| At_myb85                           | MGRP  | PCCKL  | GV  | KK  | GP    | WT    | AE   | ED   | KL   | I    | RF  | TH  |
| At_myb86                           | MGRHS | CCYKQ  | KL  | RK  | GL    | WSP   | EDEK | LNIY | T    | SN   | YG  | -CW |
| Sly_L0C1011258522_XM_004233282     | ----- | Q      | V   | E   | R     | K     | G    | P    | W    | T    | A   | E   |
| Sly_L0C1011251314_XM_004246040     | MGRAP | CCCKE  | GL  | RK  | GP    | WST   | ED   | LL   | T    | N    | Y   | IN  |
| Sly_L0C1011264528_XM_004241484     | MGRHS | VFVKE  | K   | R   | K     | L     | GL   | WSP  | EDEK | LNIY | T   | SN  |
| Sly_L0C1011264810_XM_004236205     | MGRHS | CCSVKQ | KL  | RK  | GL    | WSP   | EDEK | LNIY | T    | SN   | YG  | -CW |
| Sly_L0C1011264905_XM_004252468     | MGRP  | PCCKV  | GL  | KK  | GP    | WT    | AE   | ED   | KL   | I    | RF  | TH  |
| Sly_L0C1011268231_XM_004230323     | MGRHS | CCYKQ  | KL  | RK  | GL    | WSP   | EDEK | LKH  | I    | T    | Y   | GH  |
| Sly_L0C1011268435_XM_004248305     | MGR   | I      | P   | CC  | E     | D     | NV   | K    | R    | GP   | W   | T   |
| Sly_L0C1011265745_XM_004253144     | MGR   | T      | PC  | CS  | K     | GM    | K    | GP   | W    | T    | A   | E   |
| Sly_L0C1011265286_XM_004236340     | MGRHS | CCNQK  | KV  | RR  | GL    | WSP   | EDEK | LNIY | T    | SN   | YG  | -CW |
| Sly_L0C1011263585_XM_004234820     | MGRP  | PCCKA  | NV  | KK  | GP    | WST   | ED   | AK   | IL   | AY   | TH  | GH  |
| Sly_L0C1011268562_XM_004236642     | MGRP  | PCCKN  | EV  | KK  | GP    | WSP   | E    | D    | K    | L    | I   | RF  |
| Sly_L0C1011264349_XM_004246480     | MGRAP | CCCKE  | GL  | RK  | GP    | WST   | ED   | LL   | T    | N    | Y   | IN  |
| Sly_L0C1011268127_XM_004245674     | MGRP  | PCCKL  | GV  | KK  | GP    | WT    | AE   | ED   | KL   | I    | RF  | TH  |
| Simon_2012934                      | MGRAP | CCCKT  | KV  | RK  | GP    | WSP   | E    | D    | N    | L    | K   | NY  |
| Simon_2013395                      | AN    | S      | E   | N   | G     | E     | N    | G    | V    | E    | N   | G   |
| Simon_2028518                      | MGRP  | PCCKV  | GL  | KK  | GP    | WT    | AE   | ED   | KL   | I    | RF  | TH  |
| Simon_2029067                      | MGRS  | PCCKV  | GL  | RK  | GP    | WST   | ED   | LL   | T    | N    | Y   | IN  |
| Simon_2108188_2121208              | MGRAP | CCCKA  | NV  | KK  | GP    | WSP   | E    | D    | A    | Q    | L   | K   |
| Simon_2121808                      | ME    | K      | K   | G   | ----- | -     | V    | K    | R    | G    | S   | W   |
| Sbai_MYB11_KF008660                | MGRAP | CCCKT  | KV  | RK  | GP    | WSP   | E    | D    | N    | L    | K   | NY  |
| Sbai_MYB13_KF008662                | MGRS  | PCCKV  | GL  | RK  | GP    | WST   | ED   | LL   | T    | N    | Y   | IN  |
| Sbai_MYB15_KF008664                | MGRP  | PCCKV  | GL  | KK  | GP    | WT    | AE   | ED   | KL   | I    | RF  | TH  |
| Sbai_MYB16_KF008665                | AN    | S      | G   | N   | G     | I     | G    | E    | S    | N    | G   | V   |
| Sbai_MYB19_KF008667                | MGRS  | PCCKV  | GL  | RK  | GP    | WST   | ED   | LL   | T    | N    | Y   | IN  |
| Sbai_MYB2_KC990835                 | MGRAP | CCCKG  | NV  | KK  | GP    | WSP   | E    | D    | A    | K    | L   | I   |
| Sbai_MYB7_KC990836                 | MGRAP | CCCKA  | NV  | KK  | GP    | WSP   | E    | D    | A    | Q    | L   | K   |
| Sbai_MYB8_KF008667                 | ME    | K      | K   | G   | V     | ----- | -    | V    | K    | R    | G   | A   |
| Sind_16195                         | MGRP  | PCCKV  | GL  | KK  | GP    | WT    | AE   | ED   | KL   | I    | RF  | TH  |
| Sind_17590                         | MGRS  | PCCKV  | GL  | RK  | GP    | WST   | ED   | LL   | T    | N    | Y   | IN  |
| Sind_18942                         | MGRAP | CCCKT  | KV  | RK  | GP    | WSP   | E    | D    | N    | L    | K   | NY  |
| Sind_21139                         | MGRP  | PCCKV  | GL  | KK  | GP    | WT    | AE   | ED   | KL   | I    | RF  | TH  |
| Sind_21139_2                       | MGRS  | PCCKV  | GL  | RK  | GP    | WST   | ED   | LL   | T    | N    | Y   | IN  |
| Sind_28842                         | AN    | S      | E   | N   | G     | E     | N    | G    | V    | E    | N   | G   |
| Sind_31679                         | ME    | K      | R   | A   | E     | ----- | -    | V    | K    | R    | G   | A   |
| Sind_comp14321                     | MGRAP | CCCKA  | NV  | KK  | GP    | WSP   | E    | D    | A    | Q    | L   | K   |
| Spla_10351                         | ME    | N      | R   | A   | E     | ----- | -    | V    | K    | R    | G   | A   |
| Spla_13224                         | MGRP  | PCCKV  | GL  | KK  | GP    | WT    | AE   | ED   | KL   | I    | RF  | TH  |
| Spla_2011                          | MGRS  | PCCKV  | GL  | RK  | GP    | WST   | ED   | LL   | T    | N    | Y   | IN  |
| Spla_25860_32398                   | MGRAP | CCCKT  | KV  | RK  | GP    | WSP   | E    | D    | N    | L    | K   | NY  |
| Spla_28842                         | AN    | S      | E   | N   | G     | E     | N    | G    | V    | E    | N   | G   |
| Spla_29147                         | MGRAP | CCCKA  | NV  | KK  | GP    | WSP   | E    | D    | A    | Q    | L   | K   |
| Spla_3616                          | MGRS  | PCCKV  | GL  | RK  | GP    | WST   | ED   | LL   | T    | N    | Y   | IN  |
| Stai_12687                         | ME    | K      | K   | A   | E     | ----- | -    | V    | K    | R    | G   | A   |
| Stai_17601                         | MGRS  | PCCKV  | GL  | RK  | GP    | WST   | ED   | LL   | T    | N    | Y   | IN  |
| Stai_27949                         | MGRAP | CCCKA  | NV  | KK  | GP    | WSP   | E    | D    | A    | Q    | L   | K   |
| Stai_6424                          | MGRS  | PCCKV  | GL  | RK  | GP    | WST   | ED   | LL   | T    | N    | Y   | IN  |
| Stai_7654                          | AN    | S      | E   | N   | G     | E     | N    | G    | V    | E    | N   | G   |
| Stas_10585                         | ME    | K      | R   | A   | E     | ----- | -    | V    | K    | R    | G   | A   |
| Stas_1129                          | MGRAP | CCCKT  | KV  | RK  | GP    | WSP   | E    | D    | N    | L    | K   | NY  |
| Stas_12182                         | MGRS  | PCCKV  | GL  | RK  | GP    | WST   | ED   | LL   | T    | N    | Y   | IN  |
| Stas_14132                         | MGRP  | PCCKV  | GL  | KK  | GP    | WT    | AE   | ED   | KL   | I    | RF  | TH  |
| Stas_4055                          | MGRS  | PCCKV  | GL  | RK  | GP    | WST   | ED   | LL   | T    | N    | Y   | IN  |
| Stas_9284                          | AN    | S      | E   | N   | G     | E     | N    | G    | V    | E    | N   | G   |

**Figure S2.** Amino acid alignments of the conserved region of the R2R3 Myb genes used for the NJ tree reconstruction in Figure 1. Amtri: *Amborella trichopoda*; At: *Arabidopsis thaliana*; Os: *Oryza sativa*; Sbai: *Scutellaria baicalensis*; Sind: *Scutellaria indica*; Sly: *Solanum lycopersicum*; Smon: *Scutellaria montana*; Spla: *Scutellaria playfairii*; Stai: *Scutellaria taiwanensis*; Stas: *Scutellaria tashiroi*.
